1 **Cerebrospinal fluids from healthy pregnant women does not harbor a**  
2 **detectable microbial community**

3

4 Yongyong Kang<sup>1,3,11#</sup>, Xinchao Ji<sup>2#</sup>, Li Guo<sup>3,4,5#</sup>, Han Xia<sup>3,6#</sup>, Xiaofei Yang<sup>1,4,7</sup>, Zhen  
5 Xie<sup>8</sup>, Xiaodan Shi<sup>9</sup>, Rui Wu<sup>8</sup>, Dongyun Feng<sup>9</sup>, Chen Wang<sup>10</sup>, Min Chen<sup>10</sup>, Wenliang  
6 Zhang<sup>4</sup>, Hong Wei<sup>4</sup>, Yuanlin Guan<sup>6</sup>, Kai Ye<sup>1,3,4,5,11\*</sup>, Gang Zhao<sup>8,9\*</sup>

7

8 <sup>1</sup>Genome Institute, The First Affiliated Hospital of Xi'an Jiaotong University, Xi'an 710061, China

9 <sup>2</sup>Department of Neurology, Xi'an No. 3 Hospital, The Affiliated Hospital of Northwest University,  
10 Xi'an 710061, China

11 <sup>3</sup>School of Automation Science and Engineering, Faculty of Electronic and Information Engineering,  
12 Xi'an Jiaotong University, Xi'an 710049, China

13 <sup>4</sup>MOE Key Laboratory for Intelligent Networks & Network Security, Faculty of Electronic and  
14 Information Engineering, Xi'an Jiaotong University, Xi'an 710049, China

15 <sup>5</sup>School of Life Science and Technology, Xi'an Jiaotong University, Xi'an 710049 China

16 <sup>6</sup>Hugobiotech Co., Ltd., Beijing 100000, China

17 <sup>7</sup>School of Computer Science and Technology, Faculty of Electronic and Information Engineering,  
18 Xi'an Jiaotong University, Xi'an 710049, China

19 <sup>8</sup>School of Medicine, Northwest University, Xi'an 710069, China

20 <sup>9</sup>Department of Neurology, Xijing Hospital, The Fourth Military Medical University, Xi'an 710032,  
21 China

22 <sup>10</sup>Department of Anesthesiology, Xijing Hospital, The Fourth Military Medical University, Xi'an,  
23 710032, China

24 <sup>11</sup>Center for Mathematical Medical, The First Affiliated Hospital of Xi'an Jiaotong University, Xi'an  
25 710061, China

26

27

28 \* Corresponding author: [kaiye@xjtu.edu.cn](mailto:kaiye@xjtu.edu.cn); [zhaogang@nwu.edu.cn](mailto:zhaogang@nwu.edu.cn)

29 # These authors contributed equally to this work

30

31 **ABSTRACT** Cerebrospinal fluids circulating human central nervous system have long  
32 been considered aseptic in healthy individuals, because normally the blood-brain barrier  
33 protects against microbial invasions. However, this dogma has been questioned by  
34 several reports that microbes were identified in human brains, raising the question  
35 whether a microbial community is present in cerebrospinal fluids of healthy individuals  
36 without neurological diseases. Here, we collected and analyzed metagenomic and  
37 metatranscriptomic sequencing data of cerebrospinal fluid specimens from a cohort of  
38 23 pregnant women aged between 23 and 40 and one-to-one matched contamination  
39 controls. From data analysis of 116 specimens of eight different types, we detected 619  
40 nonredundant microbial taxa which were dominated by bacteria (75%) and viruses  
41 (24%). In cerebrospinal fluids metagenomic samples, a total of 76 redundant species  
42 were detected including four (one nonredundant) eukaryota taxa, eleven (four  
43 nonredundant) bacteria, and 61 (21 nonredundant) viruses that were mostly  
44 bacteriophages. Metagenomic data analysis found no significant difference between  
45 cerebrospinal fluid specimens and negative controls in terms of microbial species  
46 diversity. In addition, no active or viable microbiome were present in the cerebrospinal  
47 fluid samples after subtracting microbes detected in contamination controls. In  
48 conclusion, we found no strong evidence that colonized microbial community exist in  
49 the cerebrospinal fluids of healthy individuals.

50 **IMPORTANCE** Microbiome are prevalent throughout human bodies with profound  
51 health implications. However, it remains unclear whether a microbiome is present and  
52 active in human cerebrospinal fluids that are long considered aseptic given the blood-

53 brain barrier. Here, we applied unbiased metagenomic and metatranscriptomic  
54 sequencing to detect microbiome in cerebrospinal fluids collected from a cohort of 23  
55 pregnant women with matched controls. By analyzing 116 specimens of eight types, no  
56 strong evidence was found to support a presence of colonized microbiome in the  
57 cerebrospinal fluids. Our findings have profound implications to human immunity  
58 against neurological infections and disorders, providing a guide for disease diagnostics,  
59 prevention and therapeutics in clinical settings.

60

61 **Keywords:** cerebrospinal fluids, mNGS, metagenomics, pathogen, microbiome

## 62 INTRODUCTION

63 First defined by Joshua Lederberg in 2001(1), human microbiome has since been  
64 discovered at almost every part of human bodies such as gut, oral, skin, bladder, vagina,  
65 lungs(2-8). It has profound impact on human health, being associated with a broad  
66 range of human diseases including cancers, diabetes, schizophrenia and autoimmune  
67 diseases etc.(9-12). However, due to difficulties in the identification and traceability of  
68 contaminations, it remains controversial whether there are colonized microbial  
69 community at some sites such as placenta, blood and amniotic fluid (13-17), although  
70 recently both experimental and analytical methods have improved in sensitivity and  
71 accuracy regarding microbiome discovery.

72 Cerebrospinal fluid (CSF) circulating the human central nervous system (CNS) has long  
73 been considered sterile given that the blood-brain barrier is thought to effectively  
74 protect against microbial invasions. However, this traditional knowledge of microbe-  
75 free CSF has been challenged in recent years with several reports of microbes detected  
76 in human brains and CSF. For example, a bacterial pathogen *Porphyromonas gingivalis*  
77 was identified in brain regions including cerebral cortex and hippocampus in patients  
78 with Alzheimer's disease(18). In addition, a number of DNA viruses in CSF were  
79 identified from a subjects of virome(19). It remains elusive whether these reports are  
80 evidence of a common microbiome in human CSF and CNS, or simply sporadic and  
81 accidental events.

82 Given the debate over the existence of any microbial community in CSF and the  
83 importance of understanding microbial infection in human central nervous systems, we

84 performed microbiome analysis to characterize bacteria, archaea, eukaryota and viruses  
85 of CSF from a cohort of 23 donors without neurological disorders, as well as one-to-  
86 one matched positive controls (oral and skin) and negative controls (normal saline).  
87 DNA/RNA extraction buffers and sterile swab were also collected as controls. In total,  
88 116 specimens of eight types were used in this study. Considering the limitations of 16s  
89 ribosomal RNA based approach to achieve a consistent result in species or strain  
90 level(20-23), we choose unbiased metagenomic next-generation sequencing (mNGS)  
91 for rapidly detecting all genetic materials of microbiome at species resolution and use  
92 metatranscriptomic sequencing to assess the physiological states of microbial  
93 communities in CSF(24, 25). mNGS as a promising approach, its clinical diagnostic  
94 performance in infectious diseases has been widely adopted in the medical community  
95 by multi-center studies(26-28).

96 In our data analysis, we found no significant difference between CSF specimens and  
97 negative controls in microbial species diversity. In all CSF samples, no active or viable  
98 microbiome was present after subtracting microbial taxa detected in CSF by those  
99 detected in contamination controls. Taken together, no strong evidence was found in  
100 our study supporting that colonized microbiome exists in the cerebrospinal fluids.

## 101 **RESULTS**

### 102 **Metagenomic sequencing of cerebrospinal fluids in healthy individuals**

103 To investigate whether there is microbiome in CSF, we collected and analyzed  
104 microbiome of CSF samples from 23 pregnant women aged 23–40 years who  
105 underwent intraspinal anesthesia before the caesarean section via lumbar puncture,

106 coupled with normal saline collected with syringe as negative controls. For each subject,  
107 oral and skin microbiomes were also collected and analyzed as positive controls (Figure  
108 1a). All samples were then subjected to DNA extraction and metagenomic shotgun  
109 sequencing and analysis. Finally, to validate whether the microbiome, if any detected  
110 in CSF, is physiologically active, metatranscriptome profilings for 12 of the pregnant  
111 women CSF samples were performed. After quality control (QC) with KneadData(29)  
112 (v0.7.2) for metagenomic and metatranscriptomic sequencing data, MetaPhlAn(30)  
113 (latest version 3), a state-of-the-art taxonomic classification tool based on unique clade-  
114 specific marker genes, was used to detect microbes in each sample.

115 In total, we detected 619 nonredundant microbial taxa in 116 specimens using  
116 metagenomic and metatranscriptomic sequencing and analysis (Supplementary Table  
117 S1). These microbes detected in all samples were dominated by bacteria (75%) and  
118 viruses (24%). Overall, skin, oral and swab samples had the most abundant microbiome  
119 of all samples with 393, 199 and 137 nonredundant microbial taxa, respectively. This  
120 came as no surprise because skins and orals are well known to harbor a plethora of  
121 microbes. By contrast, the number of microbial taxa detected in CSF\_DNA (26),  
122 negative controls (49) and extraction buffers (27) were relatively fewer (Figure 1b).

123 We then compared the taxa detected in different specimen types, finding that there was  
124 little overlap among all samples. Skin, oral and sterile swab had a large amount of  
125 unique microbial taxa among all sample types, with 243, 129 and 36 taxa found only in  
126 these samples, respectively (Figure 1b). Although a large variation in the number of  
127 microbes detected was observed for skins, orals and swabs, a much smaller variation

128 was found for CSF\_DNA, CSF metatranscriptomic (CSF\_RNA), negative controls and  
129 extraction buffers (DNA/RNA buffer) (Figure 1b). The oral samples were rich in  
130 *Streptococcus*, *Veillonella*, *Neisseria*, *Rothia* and *Prevotella*, while the skin samples  
131 were rich in *Cutibacterium*, *Staphylococcus*, *Micrococcus*, *Malassezia*, consistent with  
132 many previous studies(4, 6, 31) (Supplementary Figure 1). Our successful detection of  
133 known microbiome for orals and skins provided a proof-of-concept of NGS-based  
134 metagenomic sequencing method, laying a solid foundation for our exploration of CSF  
135 microbiome using such a method.

136 We next focused on examining the microbial species detected for each CSF\_DNA  
137 specimen. In CSF samples, a total of 76 redundant species including 11 (4 nonredundant)  
138 bacteria, 61 (21 nonredundant) viruses and four (one nonredundant) eukaryota taxa were  
139 detected (Figure 1c). Most of these viruses were bacteriophages. The relative  
140 abundance of microbes suggested the species “*Cyprinid herpesvirus 3*” are the  
141 predominant species in 19 of 23 CSF\_DNA samples (Figure 1d). *Cutibacterium\_acnes*  
142 in species level appeared in 5 specimens. Additionally, 100%, 26%, 22%, and 22% of  
143 all CSF\_DNA samples contain *Cyprinid herpesvirus 3*, *Human alphaherpesvirus 2*,  
144 *Enterobacteria phage mEp460* and *Dasheen mosaic virus*, respectively. However,  
145 “*Cyprinid herpesvirus 3*” detected in all CSF\_DNA samples were also found in all  
146 negative and skin samples, suggesting a likely external source of these microbes during  
147 the CSF sampling procedure.

148 **The microbiome signature of cerebrospinal fluids and negative controls is similar**

149 Since microbial species were identified in both CSF\_DNA and negative controls, it is  
150 likely that microbial cells and/or DNA present in negative controls may have been  
151 introduced into CSF during the sampling process. Similarly, the possibility of skin  
152 microbiome being introduced into CSF during lumbar puncture could not be ruled out,  
153 despite the application of skin surface sterilization. Therefore, we asked how similar in  
154 general the microbiome signature is for different sample types by comparing the  
155 microbial species detected in these samples. We first performed Non-metric  
156 Multidimensional Scaling (NMDS) analysis and principal coordinates analysis (PCoA),  
157 and then characterized the beta diversity of CSF and other specimen types using Bray-  
158 Curtis distances, a metric commonly used to evaluate microbiome difference among  
159 samples supported by Wilcoxon statistical significance. NMDS, PCoA (Supplementary  
160 Figure 2), and beta-diversity analysis revealed an overall clear separation of microbial  
161 communities for each sample type, except that microbiome in CSF\_DNA specimens  
162 overlapped partially with negative controls (Figure 2a). Statistical analysis suggested  
163 beta-diversity between CSF\_DNA and other sample types was significantly different  
164 from CSF\_DNA self-comparison. However, there was no significant difference  
165 between CSF\_DNA self beta-diversity and CSF\_DNA-negative beta diversity (Wilcox  
166 test:  $p=0.59$ ) (Figure 2b). In addition, the low diversity suggested the microbial  
167 communities in CSF\_DNA and negative controls were highly similar. In fact, shared  
168 microbial taxa between CSF\_DNA and negative control accounted for 42% and 22%  
169 of CSF\_DNA and negative control, respectively. By contrast, 58% microbial taxa in  
170 CSF-DNA were detected in skin samples, whereas only 4% of skin microbes were



171 found in CSF-DNA specimens. On one hand, these results indicated the microbial cells  
172 or DNA detected in CSF samples may partly have come from negative controls during  
173 sample collection. On the other hand, the high beta-diversity between skin and CSF  
174 specimens implied that the skin surface sterilization before lumbar punctures effectively  
175 prevented the contamination of CSF samples with most, if not all, skin microbes.

176 **No microbiome is present in the CSF after subtracting microbes from controls**

177 With the detected microbiome in CSF samples, we questioned whether these microbes  
178 were truly CSF inhabitants or simply brought in from external sources such as skins,  
179 negative controls and DNA extraction buffer. To verify whether the CSF contains de  
180 facto colonized microbial communities, we subtracted the microbes collectively  
181 detected in negative control samples and DNA extraction buffer samples from microbes  
182 of each CSF\_DNA sample, a method commonly used and previously described by  
183 human microbiome study(17). After subtraction, 12 CSF samples contained no  
184 microbe, whereas the other 11 CSF samples contain a total of 14 microbial taxa  
185 including 11 viruses, 2 bacteria and 1 eukaryota. Since an introduction of microbes from  
186 skins could not be completely ruled out, we further checked whether the 14 taxa were  
187 present in skins as well and found that 6 of the 14 taxa were also found in the matching  
188 skin microbiome. This left eight microbial taxa after subtraction as potential CSF  
189 inhabiting microbes, including five viruses (“*Bovine alphaherpesvirus 1*”,  
190 “*Escherichia virus V5*”, “*Klebsiella virus KP27*”, “*Macaca mulatta polyomavirus 1*”,  
191 “*Trichoplusia\_ni\_single\_nucleopolyhedrovirus*”), two bacteria (*Hydrogenophilus*  
192 *thermoluteolus*, *Tepidimonas fonticaldi*), and one eukaryota (*Aspergillus turcosus*).

193 The detection of microbes using the metagenomic approach offers a glimpse of  
194 microorganisms present in certain niches. However, it remains uncertain whether these  
195 microbes are live or dead, as DNA from dead cells are also detectable by mNGS.  
196 Therefore, we further evaluated the physiological activities of the potential CSF-  
197 inhabiting microbes using metatranscriptomic sequencing, because the number of  
198 microbes detected by both in metagenomic and metatranscriptome would indicate  
199 active microbes may be present in CSF samples. CSF transcriptomics revealed  
200 transcripts for several microbial taxa including “*Equine infectious anemia virus*” and  
201 “*Cyprinid herpesvirus 3*” appearing in all samples, and *Escherichia coli* and *Dasheen*  
202 *mosaic virus* appearing in eleven and nine samples, respectively. We then asked, for the  
203 eleven CSF-DNA samples with microbes left after subtraction by negative controls  
204 and DNA extraction buffers, whether these microbes have detected in  
205 metatranscriptomic data. The result showed that only “*human alphaherpesvirus 1*” had  
206 signals from both CSF genomics and transcriptomics. However, “*human*  
207 *alphaherpesvirus 1*” also appeared in the skin, suggesting no active microbiome was  
208 detectable in CSF after removing this species potentially originated from skins.  
209 Although metagenomic analysis detected the one *Aspergillus turcosus* species from four  
210 individuals (Figure 3), no transcripts of *Aspergillus turcosus* were detected in  
211 metatranscriptomic, suggesting a lack of living cell activity. *Aspergillus turcosus* is well  
212 known as opportunistic human pathogens and can cause infections in individuals of  
213 compromised immune systems(32). How this fungal species (cells or DNA) reaches the  
214 CSF of the five healthy individuals is unknown, but it shows CSF, though without an

215 active microbiome, might not be entirely free of opportunistic fungi which could  
216 potentially cause infections in central nervous systems when host immune system is  
217 compromised. Taken together, our study found no strong evidence supporting actively  
218 transcribed microbiome in the CSF.

## 219 **DISCUSSION**

220 Hereby, CSF samples from a cohort of 23 healthy individuals without neurological  
221 disease with a matched set of controls were collected for microbiome detection using  
222 culture-independent approach by a whole genome shotgun sequencing. The  
223 metagenomic data analysis indicated that there was no significant difference between  
224 CSF specimens and negative controls in beta diversity of detected microbes. In addition,  
225 no clear signal of active microbiome in the CSF samples was found by comparing CSF  
226 and contamination controls. Except *Aspergillus turcosus* appeared in four samples, no  
227 microbiome was present in more than two CSF samples after being subtracted by  
228 microbes in negative controls and DNA extraction buffer.

229 Compared with bacteria, more viruses were detected in CSF specimens. These viruses  
230 are mainly bacteriophages, most of which are also present in negative and skin samples.  
231 Although bacteriophages in the CSF have been reported, clear evidence for regular  
232 colonization of CSF by these viruses is lacking (19). Whether these viruses appear  
233 accidentally or colonized in CSF needs further investigation.

234 In our results, four CSF samples contained *Aspergillus* DNA, but no *Aspergillus* nucleic  
235 acid was detected in the corresponding RNA samples, suggesting that these *Aspergillus*  
236 DNA fragments may have come from contaminations. Due to the high sensitivity of

237 mNGS, it can also detect trace amount of nucleic acid fragments released from dead  
238 microorganisms present in human periphery blood or tissues, experiment reagents and  
239 consumables. Furthermore, when using puncture to collect CSF specimen, tissues such  
240 as skin, muscle, blood vessels are potential sources of contamination. Except for strict  
241 disinfection measures before operation, constructing a database of colonizing  
242 microorganisms of these healthy tissues will enable subsequent bioinformatics analysis  
243 to filter out noise signals and reduce the false positive rate.

244 Highly sensitive mNGS represents a powerful tool for detecting microbiome at species  
245 resolution, especially for microbiome studies in specimens of low-abundance biomass,  
246 such as CSF. Currently, mNGS has become an important auxiliary method for clinical  
247 pathogenic diagnosis and treatment of infectious diseases. Main challenges of studying  
248 this issue have been an overall lack of CSF samples from healthy human subjects and  
249 the technically sound sampling as well as data analysis methods based on different  
250 reference databases and taxonomic strategies.

251 We focused on determining whether a CSF microbiome is present in healthy individuals  
252 without neurological disorders, a long-disputed issue in scientific and clinical research  
253 field. Our data analysis demonstrated that the microbiome of CSF was indistinguishable  
254 from contamination controls. It is intriguing but remains unclear whether a microbiome  
255 is present in CSF of patients diagnosed with diseases such as Alzheimer's disease,  
256 multiple sclerosis, Parkinson's disease and what roles the CSF microbiome plays in the  
257 development of these disorders.

258 In conclusion, using metagenomic combined with metatranscriptomic deep sequencing,

259 we found microbiome profile in CSF samples was indistinguishable from that in  
260 contamination controls. Our data indicated that by current approaches there was no  
261 evidence to support the existence of a CSF microbiome in the populations without  
262 known neurological disorders. Such findings shall have great implications to human  
263 health especially neurological disorders and infections, providing a guide for disease  
264 diagnostics, prevention and therapeutics in clinical settings.

## 265 **MATERIALS AND METHODS**

### 266 **Subjects**

267 Twenty-three donors were recruited from the Xijing Hospital of the Fourth Military  
268 Medical University. All subjects were enrolled from obstetrics department in which the  
269 pregnant woman aged 23–40 years need intraspinal anesthesia before the caesarean  
270 section. Subjects who have suffered from central nervous system infection disease (eg,  
271 meningitis, encephalitis) or any systemic infection disease and autoimmune disease (eg,  
272 hepatitis, tuberculosis, systemic lupus erythematosus, rheumatism) and have received  
273 antibiotics treatment in the past six months prior to sample collection were excluded.  
274 We also excluded subjects with a history of hypertension, diabetes, heart disease, cancer  
275 and neurological disease (eg, Alzheimer’s disease, Parkinson’s disease, multiple  
276 sclerosis, epilepsy).

### 277 **Sample collection**

278 Lumbar puncture was performed in the 23 subjects enrolled in this study and the CSF  
279 samples were collected in a 4ml centrifugal tube with syringe and then stored in a  
280 –80 °C freezer for metagenomics analysis. Twelve CSF samples were randomly

281 selected from 23 pregnant women for metatranscriptome studies and RNA protection  
282 reagent was added to the CSF immediately after collection. Then, the samples were  
283 centrifuged and the pellets stored at  $-80^{\circ}\text{C}$  for metatranscriptomic sequencing.  
284 Meanwhile, normal saline was collected with syringes for environmental controls  
285 (negative control). Furthermore, oral and skin samples were selected from 23 enrolled  
286 subjects as one-to-one matched positive control. For skin positive controls: The back  
287 skin of  $5\times 5\text{ cm}^2$  areas around the puncture site (L3-L4 intervertebral space) were  
288 swabbed with a sterile cotton swab before skin clean with povidone iodine. To  
289 maximize microbial load, no bathing was permitted within 24 hours of sample  
290 collection. For oral positive controls, all subjects were forbidden to eat and drink six  
291 hours before operation. The surfaces of tongue, buccal fold, hard palate, soft palate,  
292 tooth, gingiva and saliva were swabbed with sterile swab. Unused sterile swabs were  
293 collected for negative controls (“sterile swab”). Details of Matching information  
294 between samples are described in Supplementary Table S2.

#### 295 **DNA extraction and purification**

296 DNA was isolated using the QIAamp DNA Mini Kit (Qiagen 51304) according to the  
297 manufacturer’s instructions. 1) DNA extraction from swabs: Swab tips were cut and  
298 placed in a 2 ml microcentrifuge tube and then 400  $\mu\text{l}$  PBS were added. Next, 20  $\mu\text{l}$  of  
299 proteinase K and 400  $\mu\text{l}$  of buffer AL were added, vortexed for 10 s, and the solution  
300 was incubated for 15 min at  $56^{\circ}\text{C}$ . And then added 400  $\mu\text{l}$  ethanol (100%) and mixed  
301 again by vortexing. Lastly, DNA purification was performed with buffer AW1 and AW2  
302 using QIAamp Mini spin column, followed by elution with 35  $\mu\text{l}$  of buffer EB. 2) DNA

303 extraction from CSF and normal saline controls: 200  $\mu$ l sample was added into the  
304 microcentrifuge tube, and then added 20  $\mu$ l of proteinase K and 200  $\mu$ l of buffer AL  
305 respectively, vortexed for 10 s, and the solution was incubated for 15 min at 56 °C. Next,  
306 added 200  $\mu$ l ethanol (100%) and mixed again by vortexing. DNA purification was  
307 performed as described above.

### 308 **Metagenomics library construction**

309 For preparation of metagenomics libraries, the QIAseq FX DNA Library Kit (Qiagen;  
310 180715) was used. The construction involved five steps: 1) Fragmentation and End-  
311 repair: to generate 200–300 bp fragments, 32.5 $\mu$ l purified DNA were fragmented by  
312 incubation with FX buffer 5 $\mu$ l, FX enhancer 2.5 $\mu$ l and 10  $\mu$ l FX enzyme mix at cycling  
313 program: 4 °C 1minute  $\rightarrow$  32 °C 12minutes  $\rightarrow$  65 °C 30minutes  $\rightarrow$  4 °C hold. 2)  
314 Adapter ligation: 5  $\mu$ l of adaptor, 20  $\mu$ l of ligation buffer, 10  $\mu$ l of DNA ligase and 15  
315  $\mu$ l of nuclease-free water were added and incubated for 15 minutes at 20 °C to initiate  
316 adapter ligation. Adapter ligation cleanup was performed immediately, 3) Adapter  
317 ligation cleanup: 80  $\mu$ l of resuspended AMPure® XP beads (0.8 $\times$ ) were added to each  
318 ligated sample and mix well by pipetting. Next, the mixture was incubated for 5 minutes  
319 at room temperature and then the beads were pelleted on a magnetic stand (Invitrogen)  
320 for 2 minutes. The supernatant was discarded and the pallet was washed twice with 200  
321  $\mu$ l of 80% ethanol, then the beads were eluted with 52.5  $\mu$ l of buffer EB. Subsequently,  
322 50  $\mu$ l of supernatant was transferred into a new 1.5 ml microcentrifuge tube and a second  
323 purification was performed with 50  $\mu$ l (1 $\times$ ) AMPure® XP beads. The final, 23.5  $\mu$ l of  
324 purified DNA sample was obtained. 4) Amplification of library DNA: 25  $\mu$ l of HiFi

325 PCR Master Mix, 1.5  $\mu$ l of Primer Mix and 23.5  $\mu$ l of library DNA were added in PCR  
326 tube. PCR enrichment was performed under the cycle conditions: 2 minutes at 94 °C,  
327 12  $\times$  (20 s at 98 °C, 30 s at 60 °C, 30 s at 72 °C), and 1 minute at 72 °C. The final, to  
328 obtain libraries, the PCR products were purified with AMPure XP beads as described  
329 above.

### 330 **RNA extraction and purification**

331 Total RNA was extracted using the RNeasy Mini Kit (Qiagen; 74104) according to the  
332 manufacturer's instructions. The pellet of each sample which has been treated with  
333 RNA protection reagent as described above, was resuspended in 100 $\mu$ l TE buffer  
334 containing lysozyme, and Proteinase K was added into the mixture, then incubated for  
335 10 minutes at room temperature. 350 $\mu$ l of buffer RLT was added and vortexed  
336 vigorously. The final, RNA isolation and purification was performed with buffer AW1  
337 and RPE respectively using RNeasy Mini spin column, followed by elution with  
338 RNase-free water.

### 339 **RNA library preparation for metatranscriptomics sequencing**

340 For construction of RNA libraries, the QIAseq FX Single Cell RNA Library Kit (Qiagen;  
341 180733) was used. The construction involved five steps: 1) Genomic DNA (gDNA)  
342 removal: 8  $\mu$ l of purified RNA and 3  $\mu$ l of NA denaturation buffer were added into a  
343 sterile PCR tube and incubated for 3 minutes at 95 °C. To remove genomic DNA, 2  $\mu$ l  
344 of gDNA wipeout buffer was added and incubated for 10 minutes at 42 °C. 2) Reverse  
345 transcription: 4  $\mu$ l of RT/Polymerase buffer, 1  $\mu$ l of random primer, 1  $\mu$ l of Oligo dT  
346 primer and 1  $\mu$ l of Quantiscript RT enzyme mix were added in each sample and reverse



347 transcription was carried out for 60 minutes at 42 °C. 3) Ligation: 8 µl of ligase buffer  
348 and 2 µl of ligase mix were added into the RT reaction and incubated at 24°C for 30  
349 minutes. 4) Whole transcriptome amplification: 1 µl of REPLI-g SensiPhi DNA  
350 Polymerase and 29µl of reaction buffer were used for Multiple Displacement  
351 Amplification (MDA), then incubate at 30°C for 2 h. The final, an approximate length  
352 of 2000–70,000 bp amplified cDNA was produced. 5) Enzymatic Fragmentation: The  
353 amplified cDNA was diluted 1:3 in H<sub>2</sub>O sc, 10 µl of the diluted DNA and FX Enzyme  
354 Mix were used to obtain 300 bp library fragment with reaction conditions: 4 ° C  
355 1minute→32 ° C 15minutes→65 ° C 30minutes→4 ° C hold. 6) Adapter ligation: 5 µ  
356 l of adapter and 45 µ l of ligation master mix were added into each sample and incubated  
357 at 20° C for 15 minutes. Subsequently, the adapter ligation cleanup was performed with  
358 AMPure XP beads as described above. The final, purified libraries were obtained ready  
359 for sequencing without further PCR amplification.

### 360 **Next generation equencing**

361 Shotgun sequencing was performed on Illumina Hiseq platform for all samples (paired  
362 end library of 150-bp and 150-bp read length). Approximately, 25 Gb and 5 Gb of raw  
363 paired-end reads were obtained per sample in the CSF genomics samples and negative  
364 samples, respectively.

### 365 **Data quality control**

366 To reduce the impact of host reads on the results, we need to remove human reads  
367 involved in the raw sequencing data before bioinformatics analysis. KneadData(29)  
368 (v0.7.2), a widely used tool, is designed to perform quality control on metagenomic and

369 metatranscriptomic sequencing data, especially for microbiome experiments. All reads  
370 were filtered using KneadData with the following trimmomatic options:  
371 ILLUMINACLIP: TruSeq3-PE-2.fa:2:30:10:8:true, SLIDINGWINDOW:4:20,  
372 MINLEN:50 and bowtie2 options: --very-sensitive, --dovetail. The proportion of  
373 human reads in CSF genomics samples is up to 92%.

#### 374 **Detecting potential microbiome**

375 MetaPhlAn(30) (v 3.0.1) is a computational tool for profiling the composition of  
376 microbial communities (bacteria, archaea, viruses and eukaryotes) from shotgun  
377 sequencing data. Based on ~1.1M unique clade-specific marker genes identified from  
378 ~100,000 reference genomes, MetaPhlAn can profile unambiguous taxonomic  
379 assignments and accurate estimation of organismal relative abundance in species-level  
380 resolution. Classifying the reads to marker genes database, MetaPhlAn outputs a file  
381 containing detected microbes and relative abundance in different level. MetaPhlAn ran  
382 with custom parameters: --add\_viruses --input\_type fastq --read\_min\_len 50. It's worth  
383 noting that MetaPhlAn (previous version 2) was the only bioinformatics tool with 0%  
384 false positive relative abundance and the best diversity estimate(33).

#### 385 **$\beta$ -diversity and phylogenetic analysis**

386 Using R (version 3.6.3) with R studio environment,  $\beta$ -diversity (between-sample  
387 diversity) was estimated by Bray-Curtis dissimilarity in vegan package. All figures are  
388 plotted using R.

389 **Supplementary files**

390 **Supplementary Table S1.** Microbes detected in different samples.

391 **Supplementary Figure S1.** Top 10 genus in oral and skin samples, respectively. Microbial  
392 community structures of 23 Oral (figure S1a) and Skin (figure S1b) samples shown in a stacked  
393 barplot that summarizes the relative abundance of different genus detected.

394 **Supplementary Figure S2.** Principal Coordinates Analysis (PCoA) analysis of microbial species  
395 detected from different sample types.

396 **Supplementary Table S2.** Samples label and matching information.

397 **Availability of data and materials**

398 The clean sequence data reported in this paper have been deposited in the Genome  
399 Sequence Archive in BIG Data Center(34, 35), Chinese Academy of Sciences, under  
400 accession number [PRJCA004977XXXXX](#) that are publicly accessible at  
401 <https://bigd.big.ac.cn/bioprojectXXX>.

402 **Acknowledgements**

403 We thank Peng Jia, Tingjie Wang, Ningxin Dang, Honghui Shen and Tun Xu for helpful  
404 discussions regarding data analysis and Jing Hai for administrative and technical  
405 support. We thank the High-Performance Computing Cluster of the First Affiliated  
406 Hospital of Xi'an Jiaotong University for data processing.

407 This study was supported by the National Key R&D Program of China (Grant Nos.  
408 2018YFC0910400, 2017YFC0907500, and 2016 YFC0904501), the National Natural  
409 Science Foundation of China (Grant Nos. 31671372, 61702406, 31701739, and  
410 31970317), the National Science and Technology Major Project of China (Grant No.

411 2018ZX10302205), as well as the General Financial Grant from the China Postdoctoral  
412 Science Foundation (Grant Nos. 2017M623178 and 2017M623188).

413 **Ethics Statement**

414 This study was approved by the Ethics Committee of the Xijing Hospital of the Fourth  
415 Military Medical University. All procedures were conducted in accordance with the  
416 approved guidelines. All patients read and signed the consent form before sample  
417 collection.

418 **Competing interests**

419 The authors declare that they have no competing interests.

420

## 421 **References**

- 422 1. Lederberg J, McCray A. 2001. `Ome Sweet `Omics--A Genealogical Treasury of Words. *The*  
423 *Scientist* 15:8-8.
- 424 2. Gilbert JA, Blaser MJ, Caporaso JG, Jansson JK, Lynch SV, Knight R. 2018. Current  
425 understanding of the human microbiome. *Nature Medicine* 24:392-400.
- 426 3. Clemente JC, Ursell LK, Parfrey LW, Knight R. 2012. The impact of the gut microbiota on  
427 human health: an integrative view. *Cell* 148:1258-1270.
- 428 4. Nasidze I, Li J, Quinque D, Tang K, Stoneking M. 2009. Global diversity in the human salivary  
429 microbiome. *Genome research* 19:636-643.
- 430 5. Ravel J, Gajer P, Abdo Z, Schneider GM, Koenig SS, McCulle SL, Karlebach S, Gorle R, Russell J,  
431 Tacket CO. 2011. Vaginal microbiome of reproductive-age women. *Proceedings of the*  
432 *National Academy of Sciences* 108:4680-4687.
- 433 6. Grice EA, Segre JA. 2011. The skin microbiome. *Nature reviews microbiology* 9:244-253.
- 434 7. Beck JM, Young VB, Huffnagle GB. 2012. The microbiome of the lung. *Translational Research*  
435 160:258-266.
- 436 8. Huttenhower C, Gevers D, Knight R, Abubucker S, Badger JH, Chinwalla AT, Creasy HH, Earl  
437 AM, FitzGerald MG, Fulton RS. 2012. Structure, function and diversity of the healthy human  
438 microbiome. *nature* 486:207.
- 439 9. Iida N, Dzutsev A, Stewart CA, Smith L, Bouladoux N, Weingarten RA, Molina DA, Salcedo R,  
440 Back T, Cramer S. 2013. Commensal bacteria control cancer response to therapy by  
441 modulating the tumor microenvironment. *Science* 342:967-970.
- 442 10. Moreno-Indias I, Cardona F, Tinahones FJ, Queipo-Ortuño MI. 2014. Impact of the gut  
443 microbiota on the development of obesity and type 2 diabetes mellitus. *Frontiers in*  
444 *microbiology* 5:190.
- 445 11. Zhu F, Ju Y, Wang W, Wang Q, Guo R, Ma Q, Sun Q, Fan Y, Xie Y, Yang Z, Jie Z, Zhao B, Xiao L,  
446 Yang L, Zhang T, Feng J, Guo L, He X, Chen Y, Chen C, Gao C, Xu X, Yang H, Wang J, Dang Y,  
447 Madsen L, Brix S, Kristiansen K, Jia H, Ma X. 2020. Metagenome-wide association of gut  
448 microbiome features for schizophrenia. *Nature Communications* 11:1612.
- 449 12. Morgan XC, Tickle TL, Sokol H, Gevers D, Devaney KL, Ward DV, Reyes JA, Shah SA, LeLeiko N,  
450 Snapper SB. 2012. Dysfunction of the intestinal microbiome in inflammatory bowel disease  
451 and treatment. *Genome biology* 13:R79.
- 452 13. de Goffau MC, Lager S, Sovio U, Gaccioli F, Cook E, Peacock SJ, Parkhill J, Charnock-Jones DS,  
453 Smith GCS. 2019. Human placenta has no microbiome but can contain potential pathogens.  
454 *Nature* 572:329-334.
- 455 14. Lauder AP, Roche AM, Sherrill-Mix S, Bailey A, Laughlin AL, Bittinger K, Leite R, Elovitz MA,  
456 Parry S, Bushman FD. 2016. Comparison of placenta samples with contamination controls  
457 does not provide evidence for a distinct placenta microbiota. *Microbiome* 4:29.
- 458 15. Castillo DJ, Rifkin RF, Cowan DA, Potgieter M. 2019. The Healthy Human Blood Microbiome:  
459 Fact or Fiction? *Frontiers in Cellular and Infection Microbiology* 9.
- 460 16. Whittle E, Leonard MO, Harrison R, Gant TW, Tonge DP. 2019. Multi-Method Characterization  
461 of the Human Circulating Microbiome. *Frontiers in Microbiology* 9.
- 462 17. Lim ES, Rodriguez C, Holtz LR. 2018. Amniotic fluid from healthy term pregnancies does not  
463 harbor a detectable microbial community. *Microbiome* 6:1-8.
- 464 18. Dominy SS, Lynch C, Ermini F, Benedyk M, Marczyk A, Konradi A, Nguyen M, Haditsch U, Raha

- 465 D, Griffin C. 2019. Porphyromonas gingivalis in Alzheimer’s disease brains: Evidence for  
466 disease causation and treatment with small-molecule inhibitors. *Science advances*  
467 5:eaau3333.
- 468 19. Ghose C, Ly M, Schwanemann LK, Shin JH, Atabakhsh K, Barr JJ, Little M, Schooley RT, Pride  
469 DT. 2019. The virome of cerebrospinal fluid: viruses where we once thought there were none.  
470 *Frontiers in microbiology* 10:2061.
- 471 20. Engelbrektsen A, Kunin V, Wrighton KC, Zvenigorodsky N, Chen F, Ochman H, Hugenholtz P.  
472 2010. Experimental factors affecting PCR-based estimates of microbial species richness and  
473 evenness. *The ISME journal* 4:642-647.
- 474 21. Klappenbach JA, Saxman PR, Cole JR, Schmidt TM. 2001. rrndb: the Ribosomal RNA Operon  
475 Copy Number Database. *Nucleic acids research* 29:181-184.
- 476 22. Claesson MJ, Wang Q, O’Sullivan O, Greene-Diniz R, Cole JR, Ross RP, O’Toole PW. 2010.  
477 Comparison of two next-generation sequencing technologies for resolving highly complex  
478 microbiota composition using tandem variable 16S rRNA gene regions. *Nucleic acids research*  
479 38:e200-e200.
- 480 23. Gevers D, Cohan FM, Lawrence JG, Spratt BG, Coenye T, Feil EJ, Stackebrandt E, Van de Peer Y,  
481 Vandamme P, Thompson FL. 2005. Re-evaluating prokaryotic species. *Nature Reviews*  
482 *Microbiology* 3:733.
- 483 24. Bikel S, Valdez-Lara A, Cornejo-Granados F, Rico K, Canizales-Quinteros S, Soberón X, Del  
484 Pozo-Yauner L, Ochoa-Leyva A. 2015. Combining metagenomics, metatranscriptomics and  
485 viromics to explore novel microbial interactions: towards a systems-level understanding of  
486 human microbiome. *Computational and Structural Biotechnology Journal* 13:390-401.
- 487 25. Shakya M, Lo C-C, Chain PSG. 2019. Advances and Challenges in Metatranscriptomic Analysis.  
488 *Frontiers in Genetics* 10.
- 489 26. Ramachandran PS, Wilson MR. 2020. Metagenomics for neurological infections — expanding  
490 our imagination. *Nature Reviews Neurology* 16:547-556.
- 491 27. Chiu CY, Miller SA. 2019. Clinical metagenomics. *Nature Reviews Genetics* 20:341-355.
- 492 28. Wilson MR, Sample HA, Zorn KC, Arevalo S, Yu G, Neuhaus J, Federman S, Stryke D, Briggs B,  
493 Langelier C, Berger A, Douglas V, Josephson SA, Chow FC, Fulton BD, DeRisi JL, Gelfand JM,  
494 Naccache SN, Bender J, Dien Bard J, Murkey J, Carlson M, Vespa PM, Vijayan T, Allyn PR,  
495 Campeau S, Humphries RM, Klausner JD, Ganzon CD, Memar F, Ocampo NA, Zimmermann LL,  
496 Cohen SH, Polage CR, DeBiasi RL, Haller B, Dallas R, Maron G, Hayden R, Messacar K,  
497 Dominguez SR, Miller S, Chiu CY. 2019. Clinical Metagenomic Sequencing for Diagnosis of  
498 Meningitis and Encephalitis. *New England Journal of Medicine* 380:2327-2340.
- 499 29. Anonymous. KneadData software: <http://huttenhower.sph.harvard.edu/kneaddata>.
- 500 30. Segata N, Waldron L, Ballarini A, Narasimhan V, Jousson O, Huttenhower C. 2012.  
501 Metagenomic microbial community profiling using unique clade-specific marker genes.  
502 *Nature Methods* 9:811-814.
- 503 31. Chen YE, Fischbach MA, Belkaid Y. 2018. Skin microbiota–host interactions. *Nature* 553:427-  
504 436.
- 505 32. Wilson MR, O’Donovan BD, Gelfand JM, Sample HA, Chow FC, Betjemann JP, Shah MP, Richie  
506 MB, Gorman MP, Hajj-Ali RA, Calabrese LH, Zorn KC, Chow ED, Greenlee JE, Blum JH, Green G,  
507 Khan LM, Banerji D, Langelier C, Bryson-Cahn C, Harrington W, Lingappa JR, Shanbhag NM,  
508 Green AJ, Brew BJ, Soldatos A, Strnad L, Doernberg SB, Jay CA, Douglas V, Josephson SA,

- 509 DeRisi JL. 2018. Chronic Meningitis Investigated via Metagenomic Next-Generation  
510 Sequencing. *JAMA Neurology* 75:947-955.
- 511 33. Amos GCA, Logan A, Anwar S, Fritzsche M, Mate R, Bleazard T, Rijpkema S. 2020. Developing  
512 standards for the microbiome field. *Microbiome* 8:98.
- 513 34. Wang Y, Song F, Zhu J, Zhang S, Yang Y, Chen T, Tang B, Dong L, Ding N, Zhang Q, Bai Z, Dong X,  
514 Chen H, Sun M, Zhai S, Sun Y, Yu L, Lan L, Xiao J, Fang X, Lei H, Zhang Z, Zhao W. 2017. GSA:  
515 Genome Sequence Archive\*. *Genomics, Proteomics & Bioinformatics* 15:14-18.
- 516 35. Members NGDC, Partners. 2019. Database Resources of the National Genomics Data Center  
517 in 2020. *Nucleic Acids Research* 48:D24-D33.
- 518

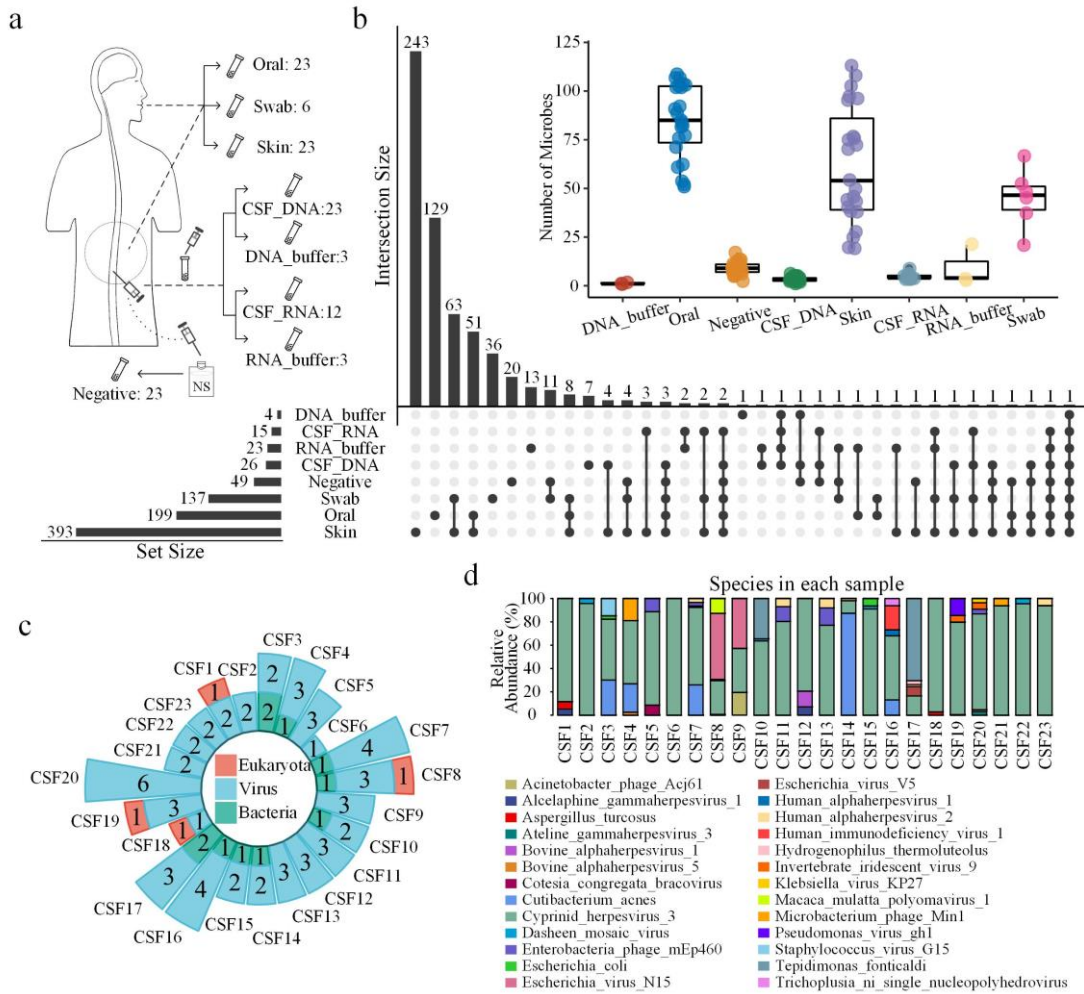

519

520 **Figure 1: Microbial community structure in human CSF of 23 healthy individuals.** (a)  
521 Metagenomic experimental design in this study: CSF and matched control samples (positive  
522 controls: oral and skin; negative controls: saline solution) collected from 23 pregnant women along  
523 with DNA and RNA extraction buffers (number indicates replicates) and were sequenced for  
524 metagenomic and metatranscriptomic analysis (see Methods). (b) An overview of microbes detected  
525 in each sample type. The number of microbes detected in each sample, and shared species between  
526 different samples were shown in the upset plot, with the dots representing intersections among  
527 sample types, and the bars representing the number of microbes for each sample type (horizontal  
528 bars) and ones shared for each intersection type (vertical bars). The inset shows a box plot  
529 summarizing distributions of the number of species detected for different sample types. (c) Circle  
530 barplot summarizing the number of microbial species in each CSF\_DNA sample, categorized  
531 into three major types: eukaryota, virus and bacteria. (d) Microbial community structures of 23  
532 CSF\_DNA samples shown in a stacked barplot that summarizes the relative abundance of different  
533 species of microbes detected for each CSF\_DNA sample.

534



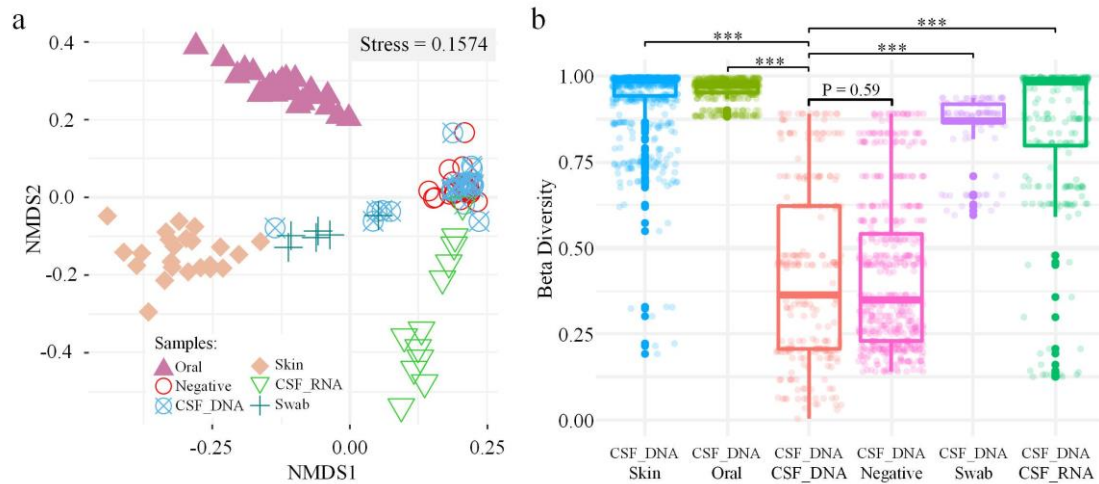

535

536 **Figure 2. Microbiome similarity among sample types.** (a) NMDS (Non-metric Multidimensional  
537 Scaling) analysis of microbial species detected from different sample types. Shapes and colors  
538 represent sample types. (b) Boxplot summarizing the beta diversity within CSF\_DNA and between  
539 CSF\_DNA and other specimens using Bray-Cruits dissimilarity. Statistical significance was  
540 assessed by Wilcoxon test whose significance level is indicated with asterisks (\*\*\*: P<0.001).

541

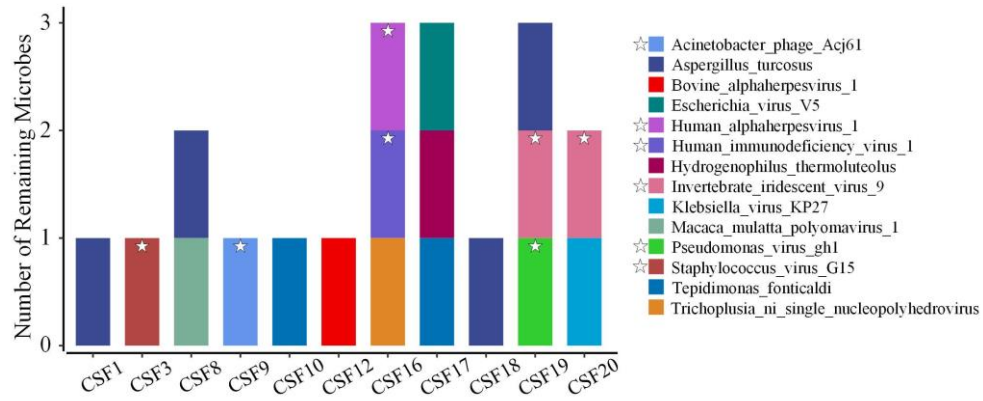

542

543 **Figure 3. Microbes remained in the cerebrospinal fluids.** Subtracting the microbes appeared in the  
544 negative control and DNA extraction buffer, 14 species (6 species labeled with star appeared in skin  
545 samples) remained in CSF genomic samples.

546 **Supplementary Figure S1: Top 10 genus in oral and skin samples, respectively.**

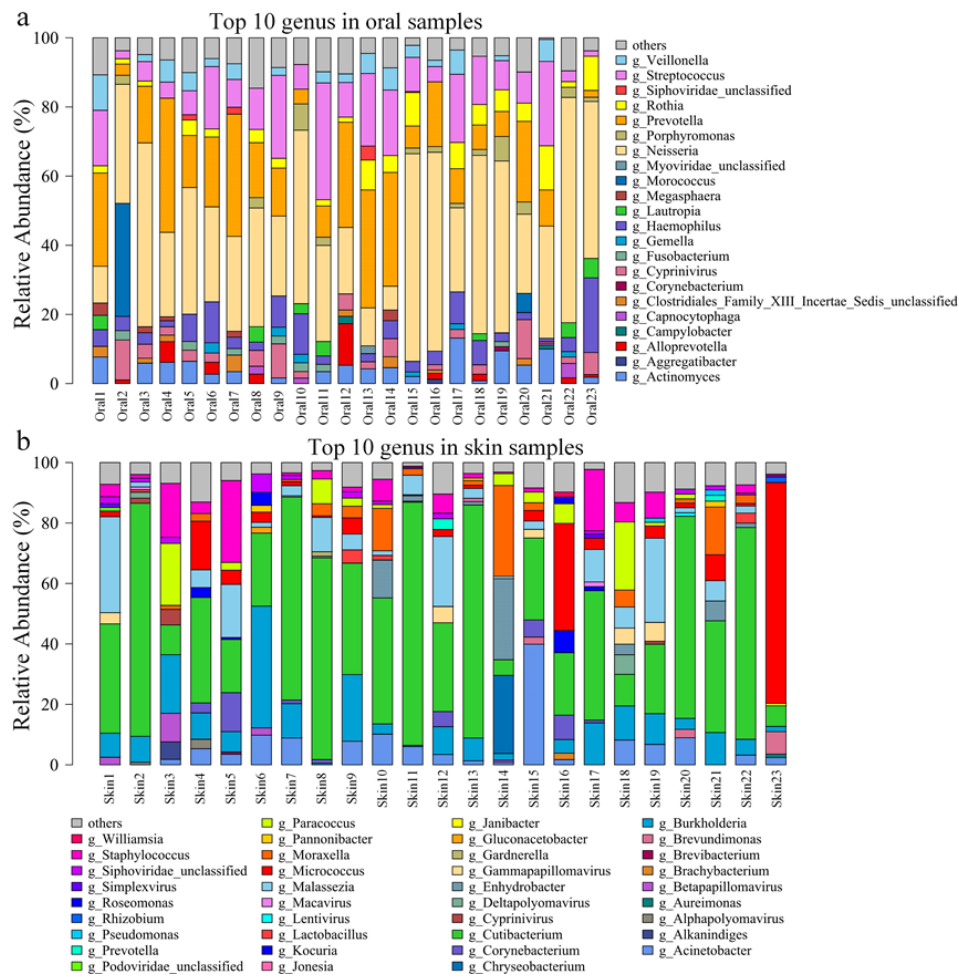

547

548 Microbial community structures of 23 Oral (figure S1a) and Skin (figure S1b) samples shown in a

549 stacked barplot that summarizes the relative abundance of different genus detected.

550 **Supplementary Figure S2:** Principal Coordinates Analysis (PCoA) analysis of  
551 microbial species detected from different sample types.

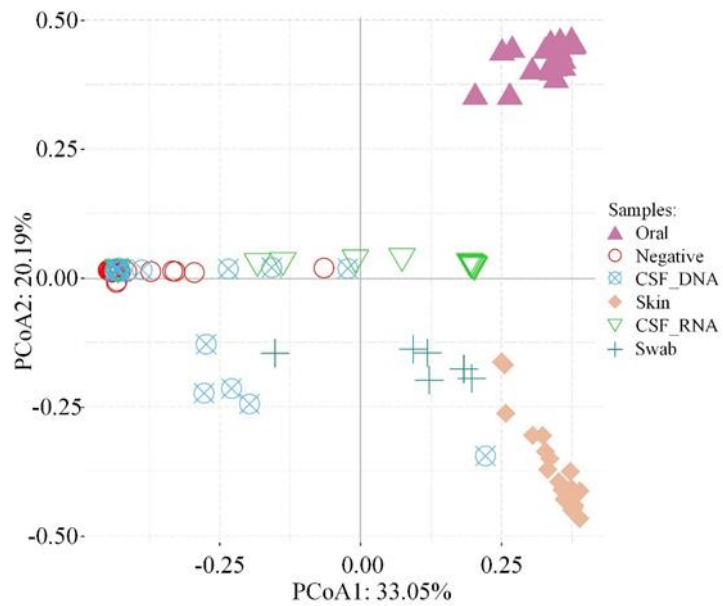

552

553 PCoA (Principal Coordinates Analysis) analysis of microbial species detected from different sample  
554 types. Shapes and colors represent sample types.

555

556 **Supplementary Table S2: Sample labels and matching information.**

| Table S1: Samples label and matching information |          |      |      |         |      |            |            |
|--------------------------------------------------|----------|------|------|---------|------|------------|------------|
| CSF_DNA                                          | Negative | Skin | Oral | CSF_RNA | Swab | RNA_buffer | DNA_buffer |
| 1                                                | 1        | 1    | 1    | 1       | 1    | 1          | 1          |
| 2                                                | 2        | 2    | 2    |         | 2    | 2          | 2          |
| 3                                                | 3        | 3    | 3    |         | 3    | 3          | 3          |
| 4                                                | 4        | 4    | 4    | 4       | 4    |            |            |
| 5                                                | 5        | 5    | 5    |         | 5    |            |            |
| 6                                                | 6        | 6    | 6    |         | 6    |            |            |
| 7                                                | 7        | 7    | 7    |         |      |            |            |
| 8                                                | 8        | 8    | 8    | 8       |      |            |            |
| 9                                                | 9        | 9    | 9    | 9       |      |            |            |
| 10                                               | 10       | 10   | 10   | 10      |      |            |            |
| 11                                               | 11       | 11   | 11   |         |      |            |            |
| 12                                               | 12       | 12   | 12   |         |      |            |            |
| 13                                               | 13       | 13   | 13   |         |      |            |            |
| 14                                               | 14       | 14   | 14   | 14      |      |            |            |
| 15                                               | 15       | 15   | 15   | 15      |      |            |            |
| 16                                               | 16       | 16   | 16   | 16      |      |            |            |
| 17                                               | 17       | 17   | 17   |         |      |            |            |
| 18                                               | 18       | 18   | 18   | 18      |      |            |            |
| 19                                               | 19       | 19   | 19   | 19      |      |            |            |
| 20                                               | 20       | 20   | 20   |         |      |            |            |
| 21                                               | 21       | 21   | 21   | 21      |      |            |            |
| 22                                               | 22       | 22   | 22   |         |      |            |            |
| 23                                               | 23       | 23   | 23   | 23      |      |            |            |
| CSF_DNA: Cerebrospinal fluids metagenomic        |          |      |      |         |      |            |            |
| CSF_RNA: Cerebrospinal fluids metatranscriptomic |          |      |      |         |      |            |            |

557
